# Supplementary material for: Discovery of Novel Symmetrical 1,4-Dihydropyridines as Inhibitors of Multidrug-Resistant Protein (MRP4) Efflux Pump for Anticancer Therapy
Source: MDPI journal article supplement (doi:10.3390/molecules26010018), 2020-12-22
Supplement: s1 [file s1]

*Supplementary Materials*

*Communication*

# **Discovery of Novel Symmetrical 1,4-Dihydropyridines as Inhibitors of Multidrug-Resistant Protein (MRP4) Efflux Pump for Anticancer Therapy**

**Henry Döring <sup>1</sup>, David Kreutzer <sup>1</sup>, Christoph Ritter <sup>2</sup> and Andreas Hilgeroth <sup>1,\*</sup>**

<sup>1</sup> Institute of Pharmacy, Research Group of Drug Development, Martin Luther University Halle-Wittenberg; andreas.hilgeroth@pharmazie.uni-halle.de

<sup>2</sup> Institute of Pharmacy, Department of Clinical Pharmacy, Ernst Moritz Arndt University Greifswald; ritter@uni-greifswald.de

Colo-357 V

Colo-357 MRP4

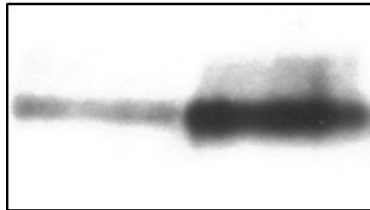

MRP4

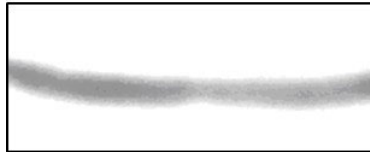

$\beta$ -actin
